# Supplementary material for: Integrated single cell data analysis reveals cell specific networks and novel coactivation markers
Source: PubMed Central journal article supplement (PMC5249008; doi:10.1186/s12918-016-0370-4), 2016-12-05

**SRR2911192**

Centralization: 0.14

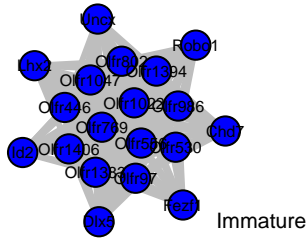**SRR2961027**

Centralization: 0.19

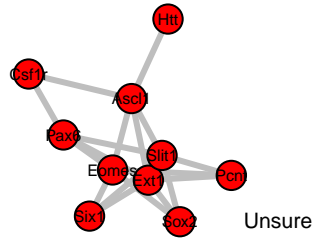**SRR2961047**

Centralization: 0.24

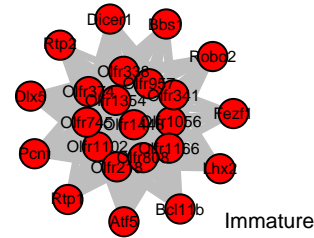**SRR2911285**

Centralization: 0.32

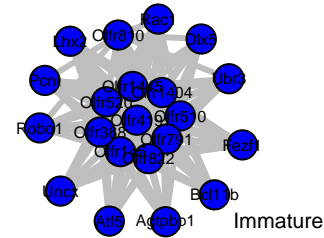**SRR2961044**

Centralization: 0.35

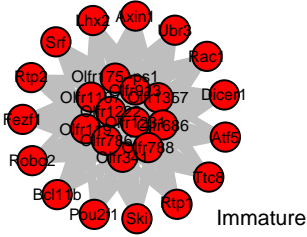**ERS361325**

Centralization: 0.36

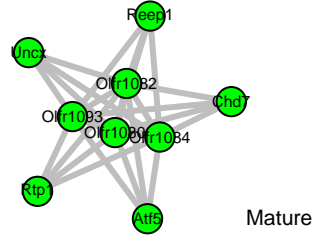**SRR2961022**

Centralization: 0.38

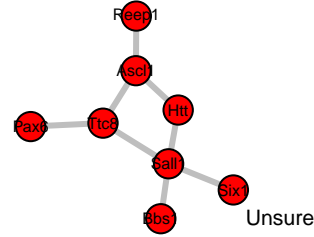**SRR2911106**

Centralization: 0.38

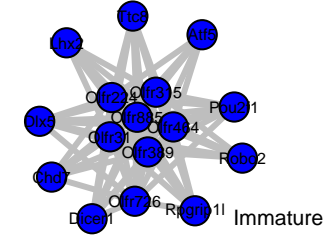**SRR2961043**

Centralization: 0.39

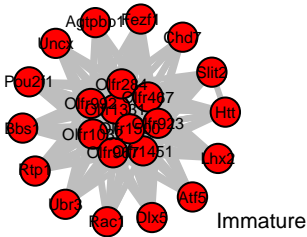**ERS361343**

Centralization: 0.4

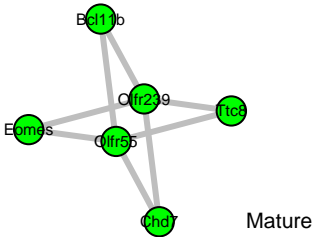**SRR2961021**

Centralization: 0.42

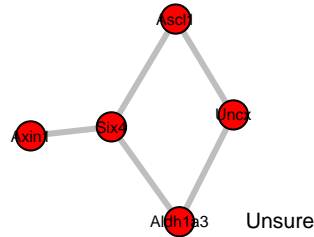**SRR2961041**

Centralization: 0.45

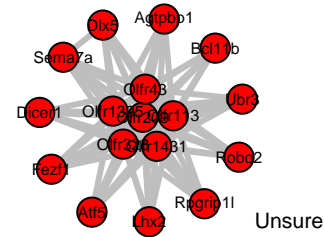**SRR2911127**

Centralization: 0.49

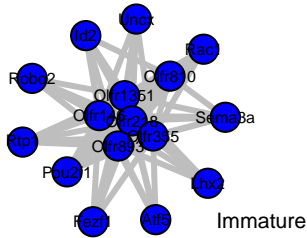**SRR2961078**

Centralization: 0.49

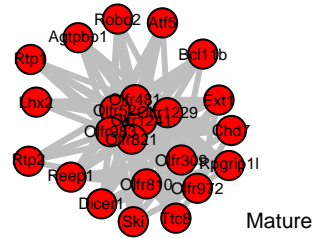**SRR2911196**

Centralization: 0.5

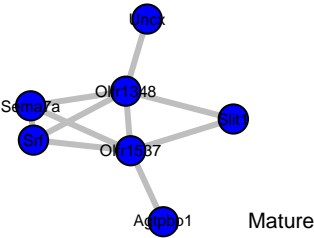**SRR2911197**

Centralization: 0.5

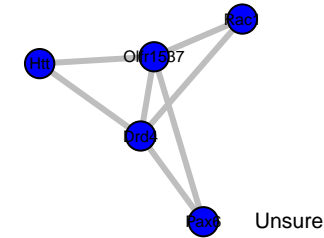**SRR2961099**

Centralization: 0.51

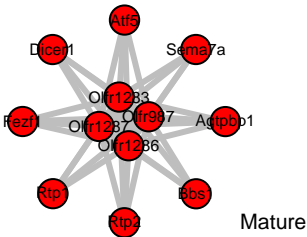**SRR2961049**

Centralization: 0.52

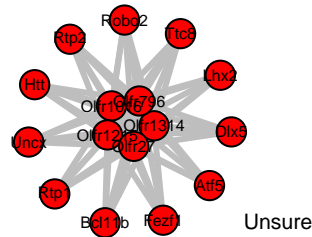**SRR2961058**

Centralization: 0.52

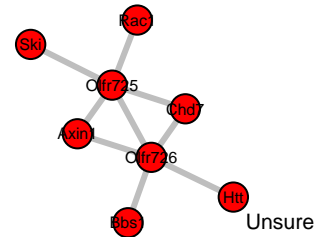**SRR2961029**

Centralization: 0.53

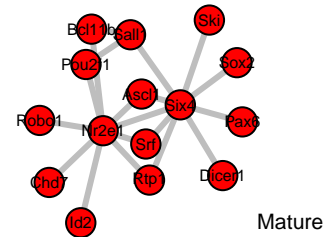**SRR2911257**

Centralization: 0.58

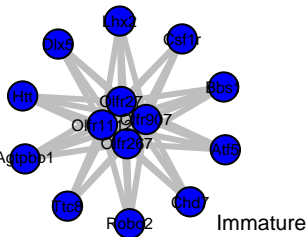**SRR2961076**

Centralization: 0.58

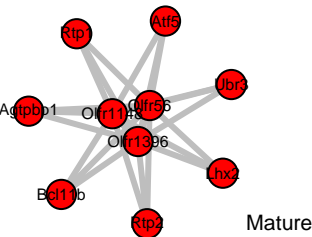**SRR2961105**

Centralization: 0.58

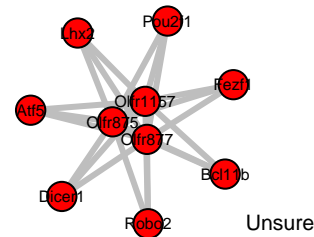**SRR2911161**

Centralization: 0.58

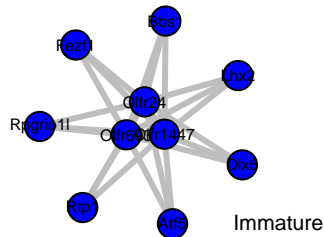

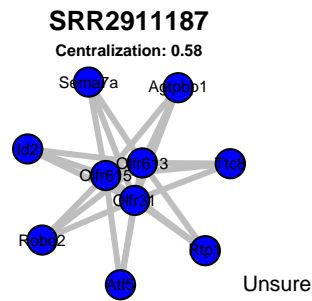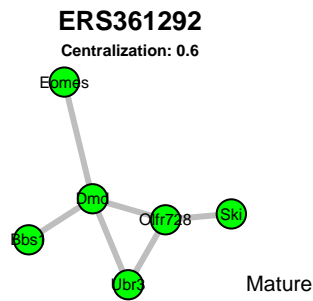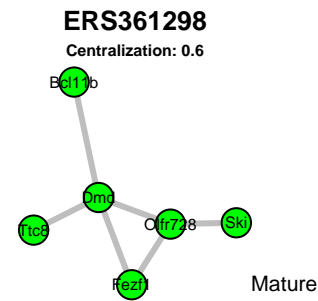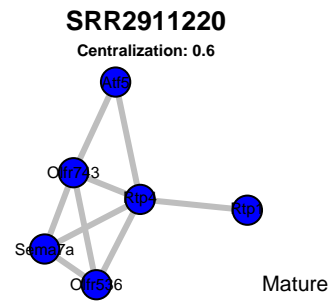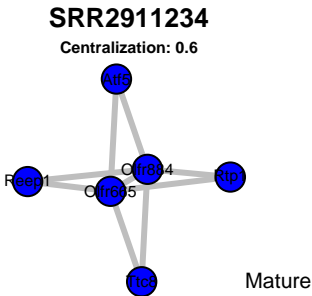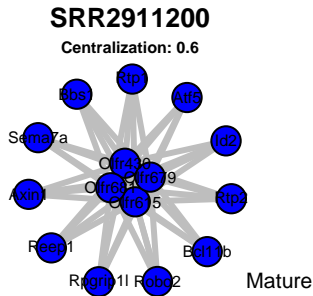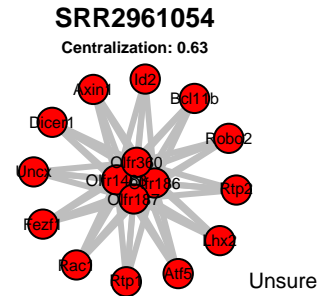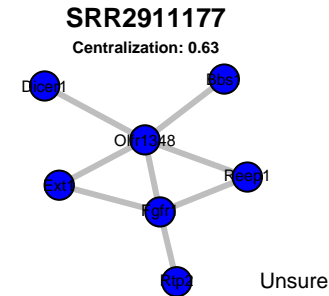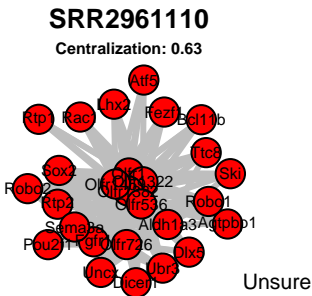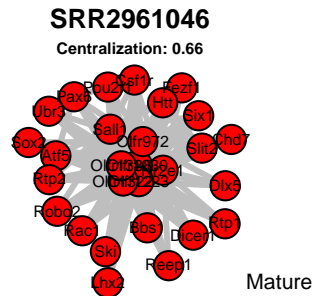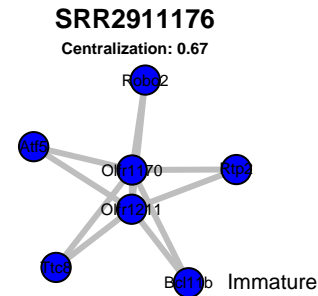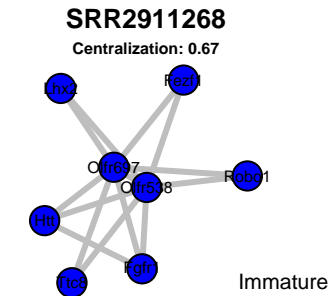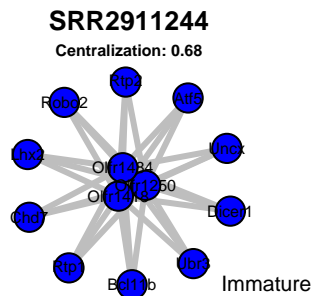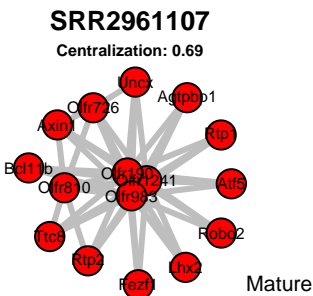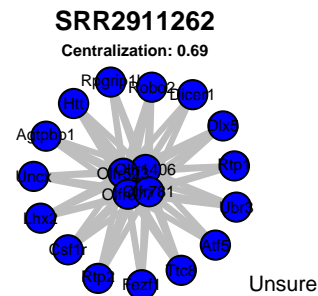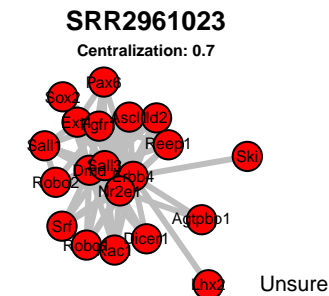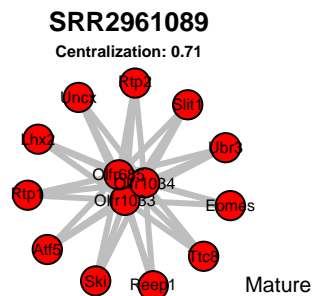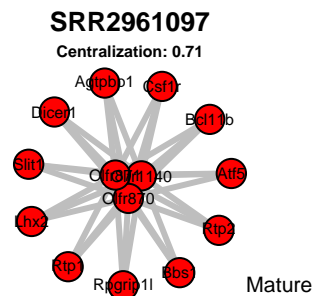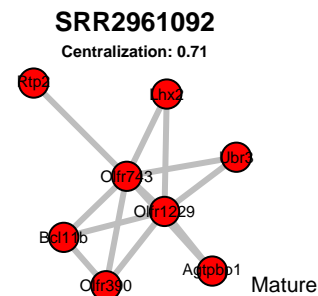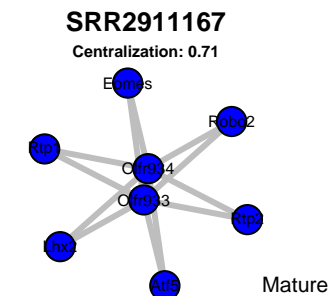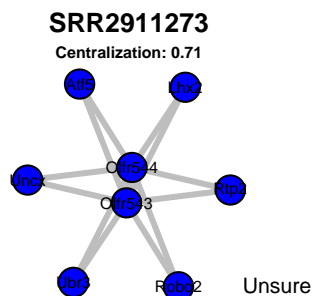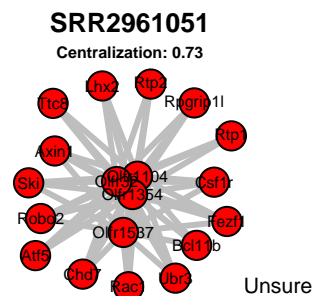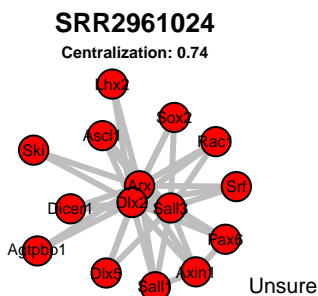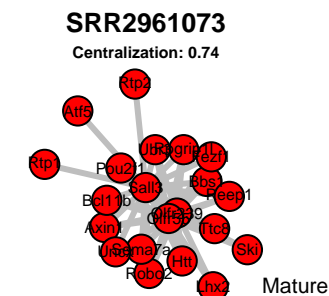

**ERS361357**

Centralization: 0.75

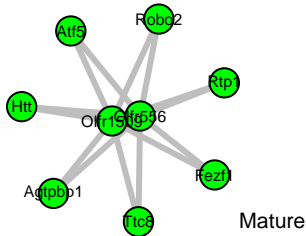**SRR2911206**

Centralization: 0.75

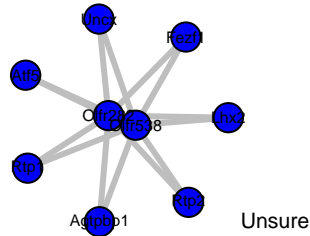**SRR2911213**

Centralization: 0.75

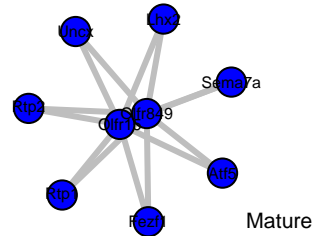**SRR2961063**

Centralization: 0.76

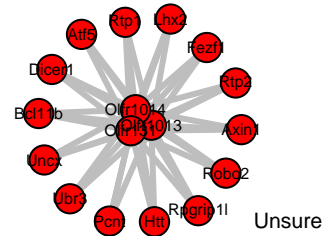**SRR2961028**

Centralization: 0.76

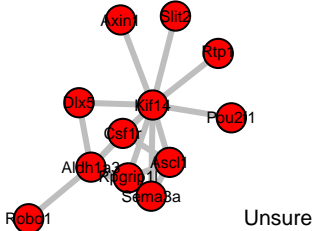**SRR2961031**

Centralization: 0.76

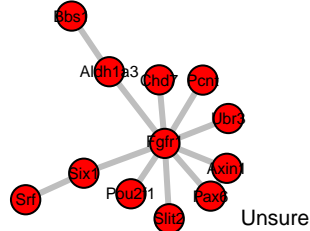**SRR2911263**

Centralization: 0.76

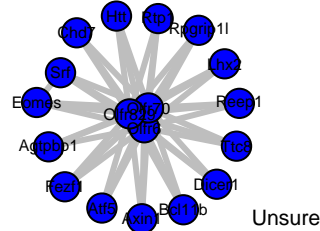**SRR2911201**

Centralization: 0.77

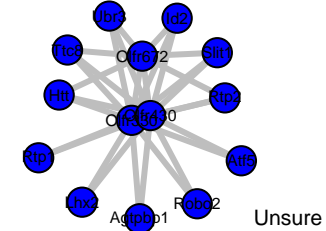**SRR2911221**

Centralization: 0.77

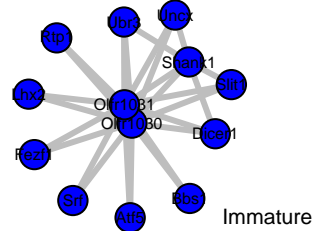**SRR2961085**

Centralization: 0.78

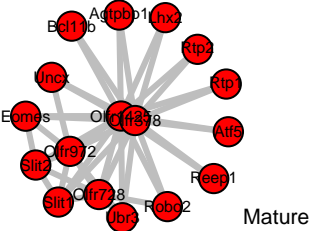**ERS361309**

Centralization: 0.78

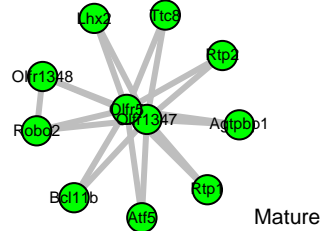**SRR2911238**

Centralization: 0.78

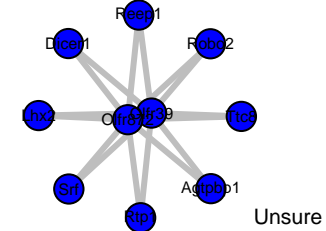**SRR2961111**

Centralization: 0.78

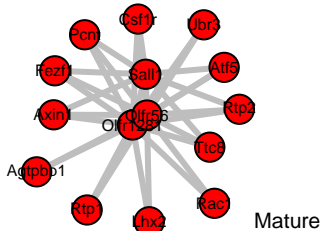**SRR2961095**

Centralization: 0.8

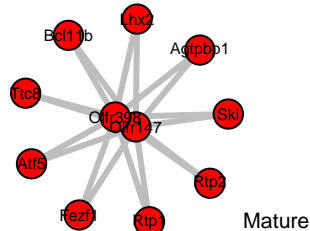**SRR2961032**

Centralization: 0.81

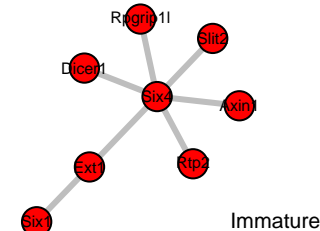**SRR2911109**

Centralization: 0.82

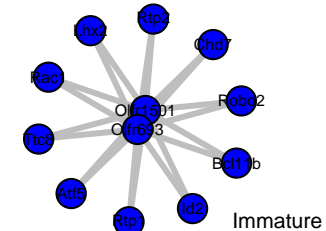**SRR2911255**

Centralization: 0.82

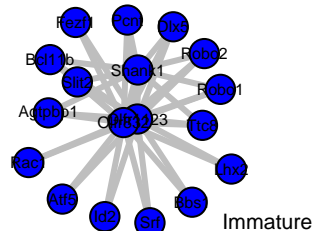**SRR2961026**

Centralization: 0.83

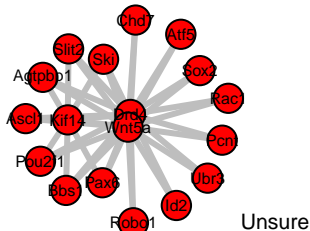**SRR2961030**

Centralization: 0.83

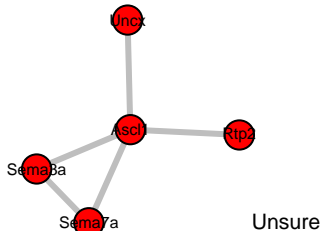**SRR2961094**

Centralization: 0.83

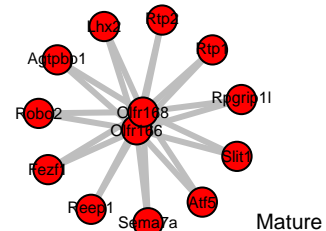**SRR2961100**

Centralization: 0.83

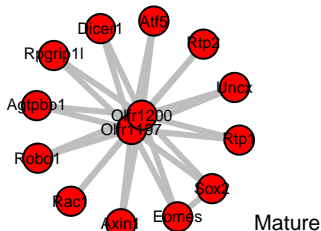**SRR2911148**

Centralization: 0.83

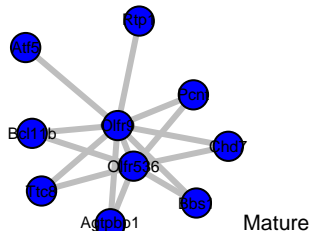**SRR2911180**

Centralization: 0.83

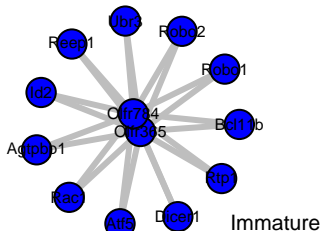**SRR2911271**

Centralization: 0.83

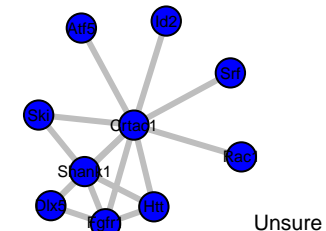

**SRR2961055**

Centralization: 0.85

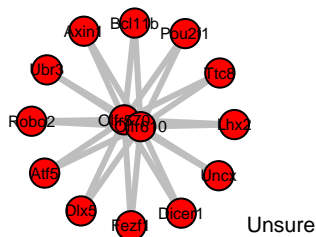**SRR2961090**

Centralization: 0.85

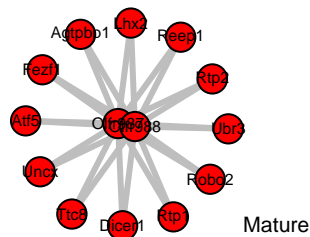**SRR2961106**

Centralization: 0.85

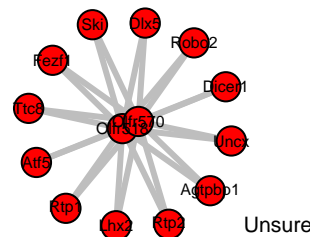**SRR2911239**

Centralization: 0.85

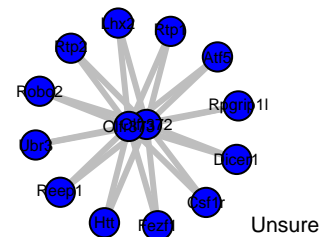**SRR2961084**

Centralization: 0.86

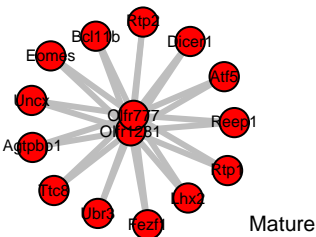**SRR2961087**

Centralization: 0.86

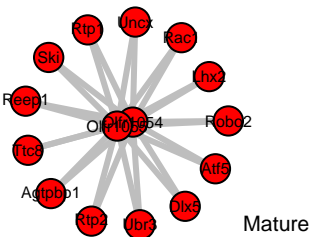**SRR2911124**

Centralization: 0.86

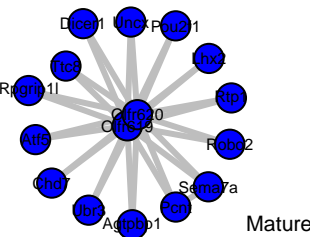**SRR2911157**

Centralization: 0.86

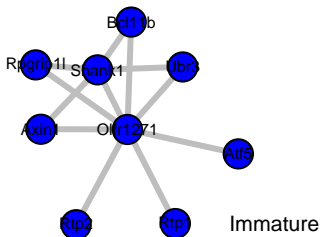**SRR2911235**

Centralization: 0.86

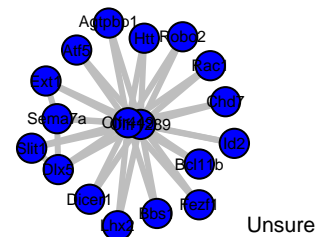**SRR2961052**

Centralization: 0.87

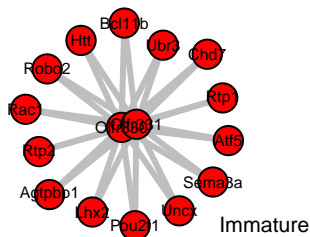**SRR2911282**

Centralization: 0.88

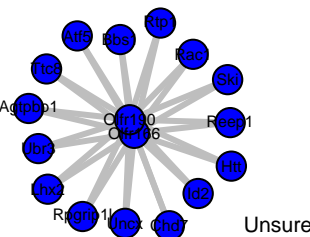**SRR2961048**

Centralization: 0.88

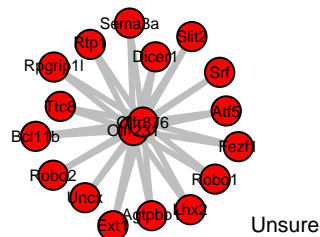**SRR2961068**

Centralization: 0.88

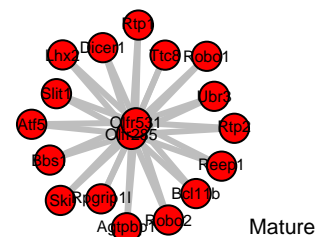**SRR2961069**

Centralization: 0.89

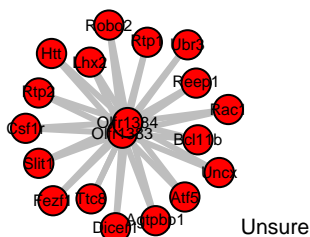**SRR2911152**

Centralization: 0.89

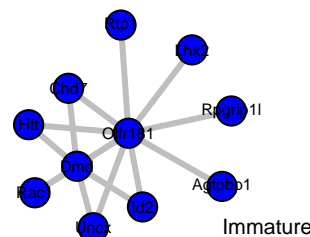**SRR2911186**

Centralization: 0.9

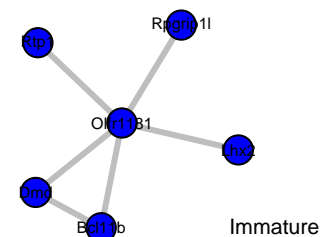**SRR2911195**

Centralization: 0.9

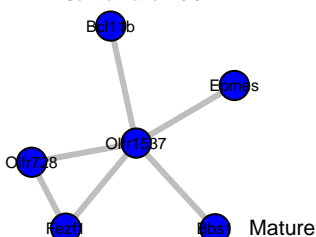**SRR2961083**

Centralization: 0.9

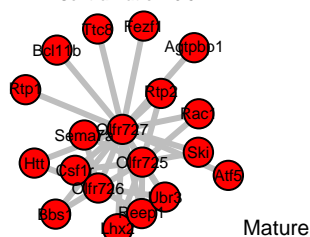**SRR2911162**

Centralization: 0.9

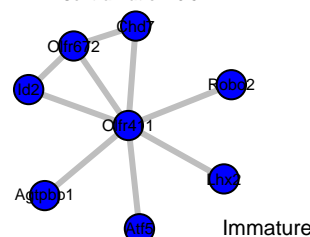**SRR2961104**

Centralization: 0.92

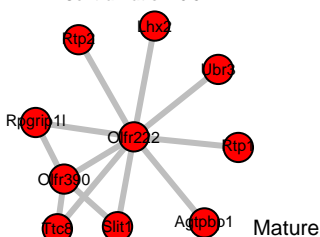**SRR2911226**

Centralization: 0.92

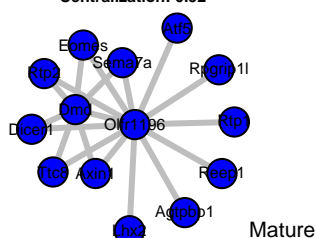**SRR2961025**

Centralization: 0.93

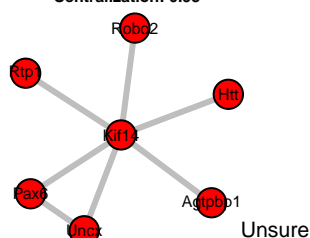**SRR2911114**

Centralization: 0.93

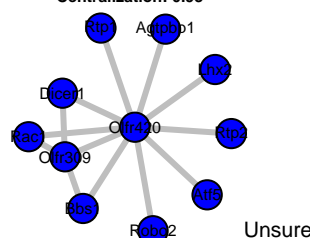**SRR2911168**

Centralization: 0.93

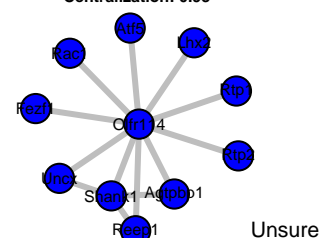

**SRR2961036**

Centralization: 0.94

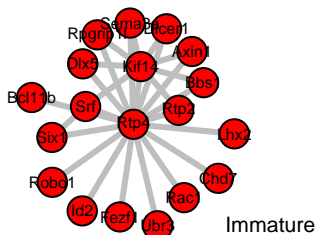**SRR2961101**

Centralization: 0.94

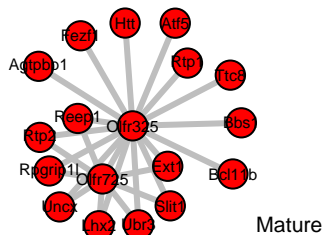**SRR2961075**

Centralization: 0.95

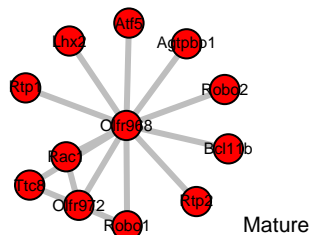**SRR2961102**

Centralization: 0.95

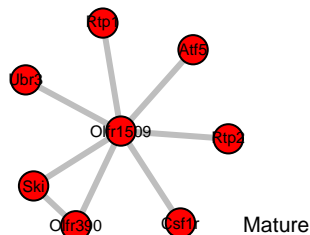**SRR2911199**

Centralization: 0.95

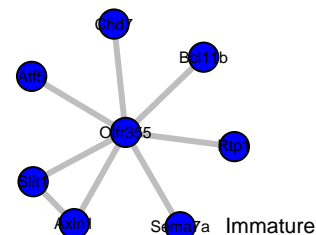**SRR2961033**

Centralization: 0.96

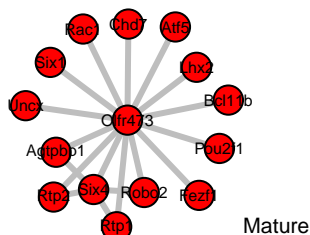**SRR2911175**

Centralization: 0.96

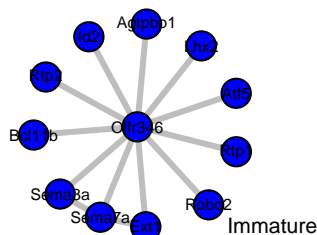**SRR2911155**

Centralization: 0.97

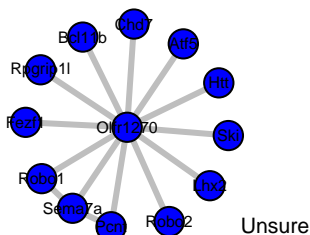**SRR2911188**

Centralization: 0.97

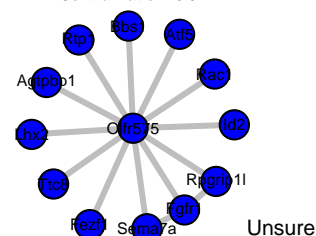**SRR2961061**

Centralization: 0.98

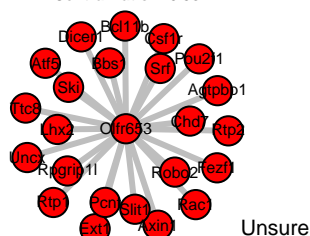**SRR2961060**

Centralization: 0.99

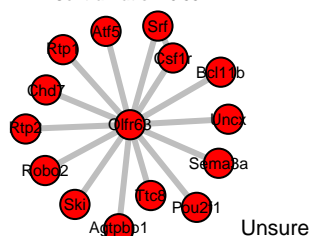**SRR2911110**

Centralization: 0.99

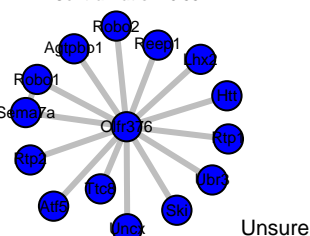**SRR2961081**

Centralization: 0.99

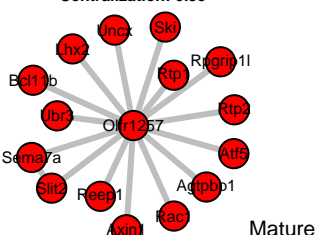**SRR2961071**

Centralization: 0.99

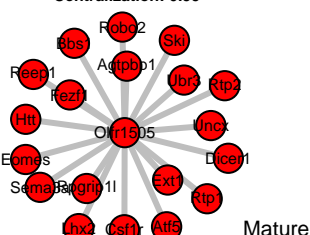**SRR2961039**

Centralization: 1

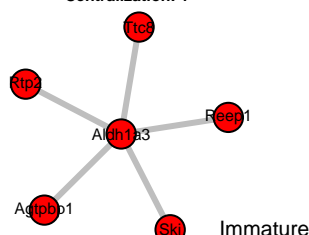**SRR2961040**

Centralization: 1

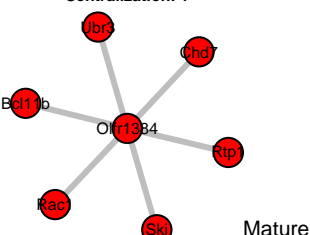**SRR2961042**

Centralization: 1

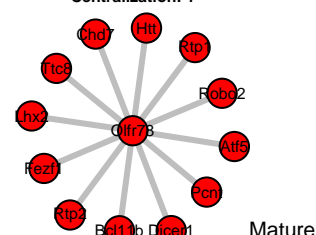**SRR2961045**

Centralization: 1

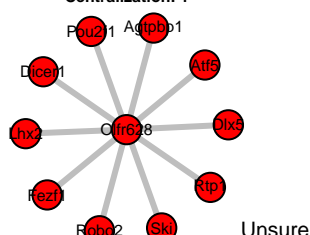**SRR2961050**

Centralization: 1

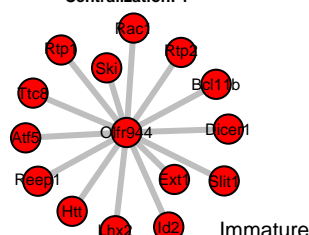**SRR2961053**

Centralization: 1

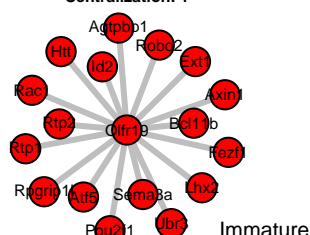**SRR2961057**

Centralization: 1

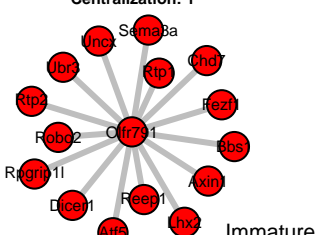**SRR2961059**

Centralization: 1

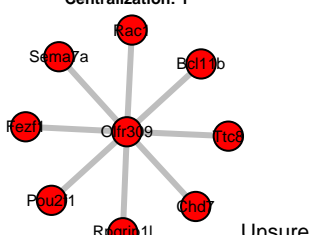**SRR2961062**

Centralization: 1

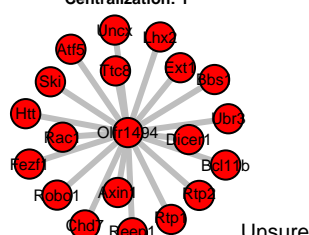**SRR2961065**

Centralization: 1

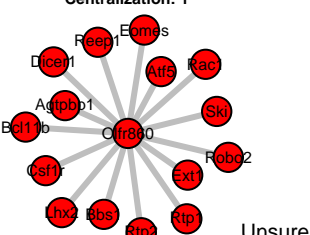



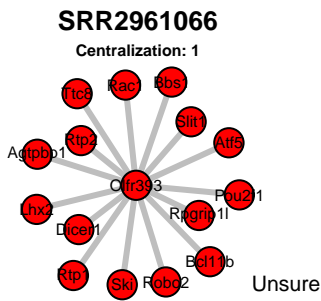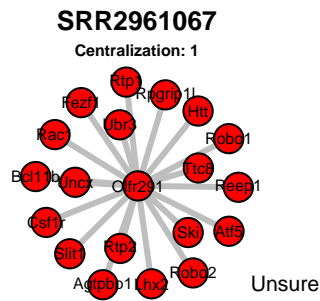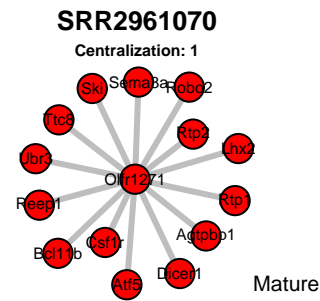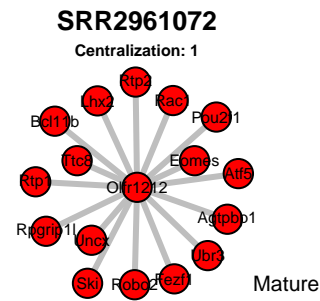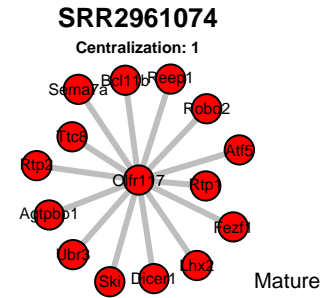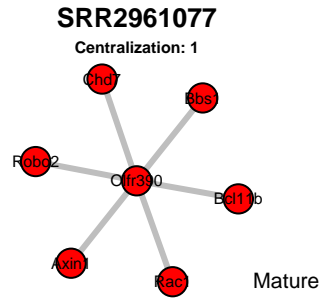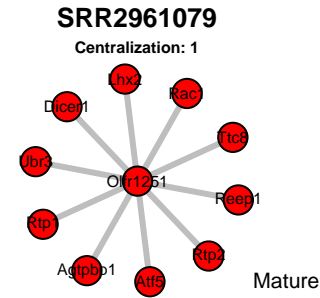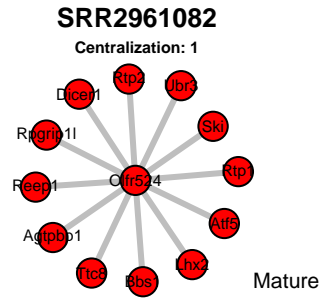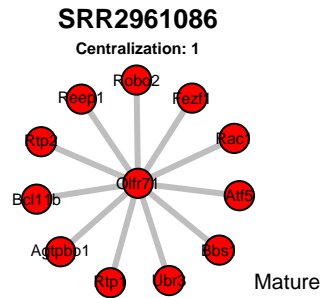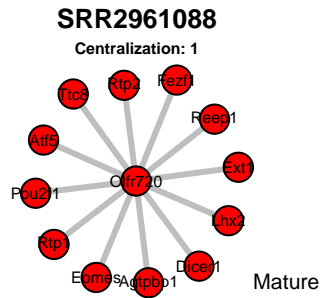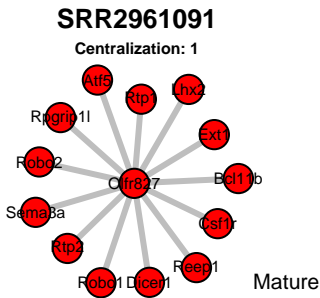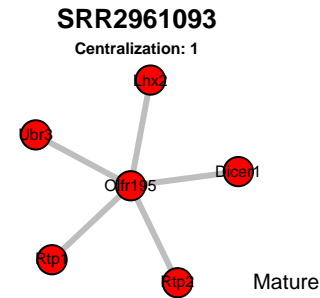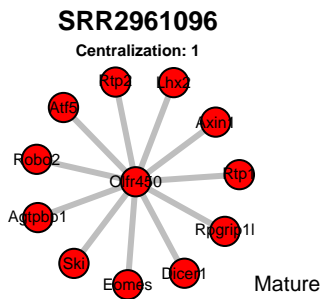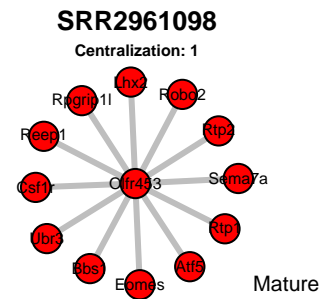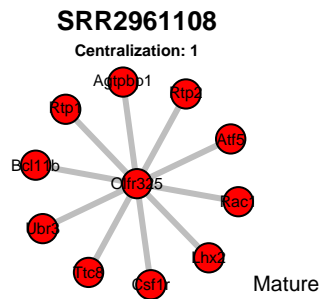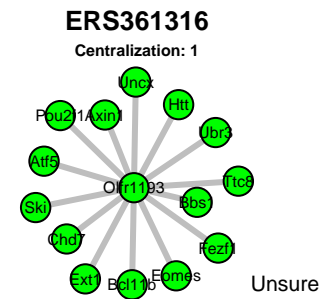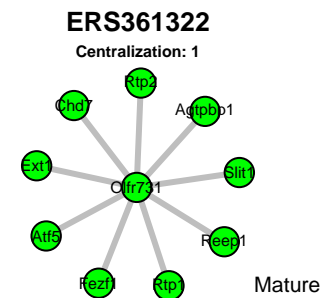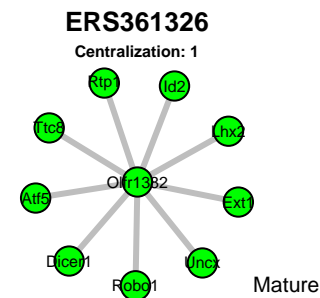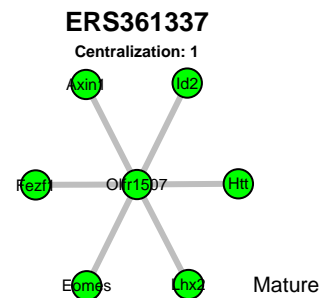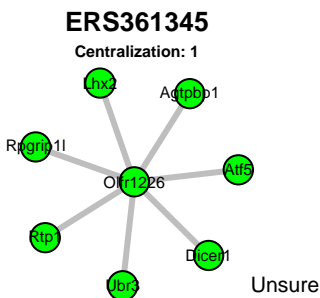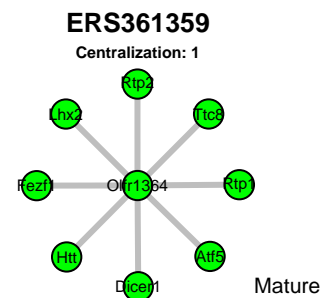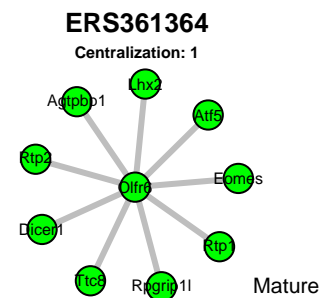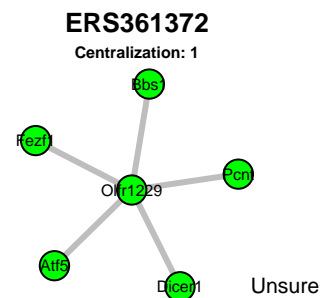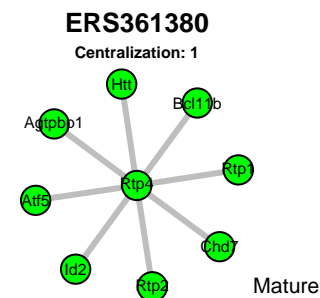

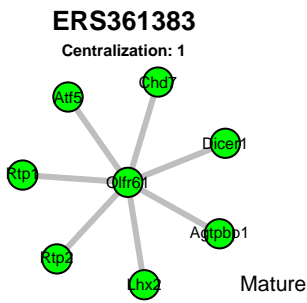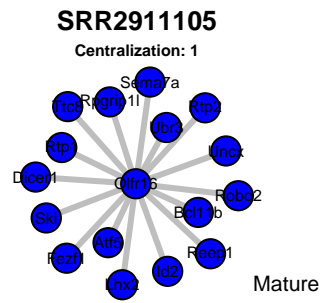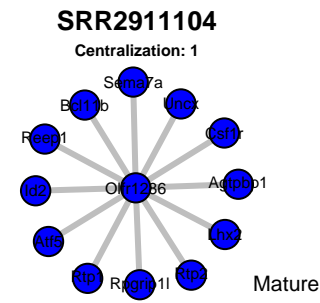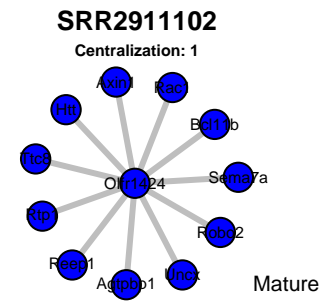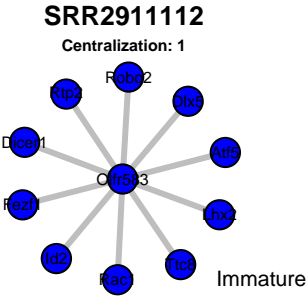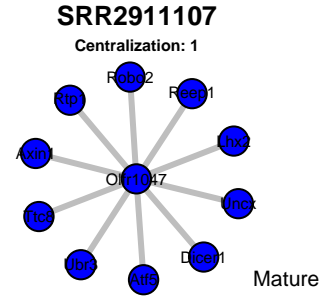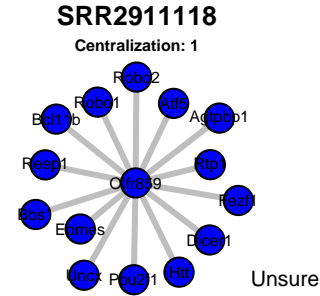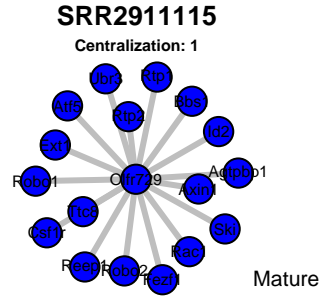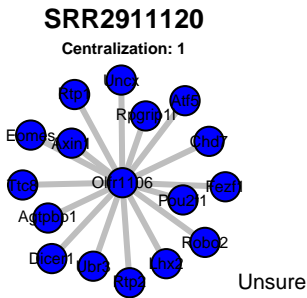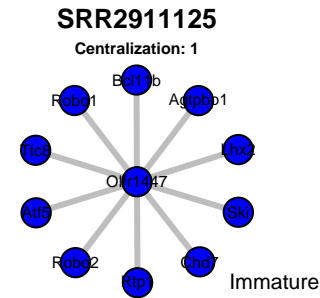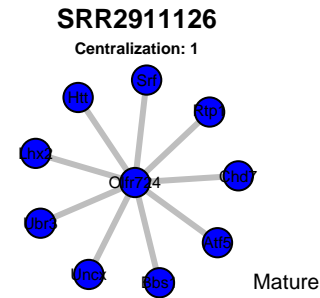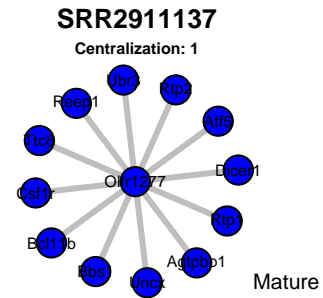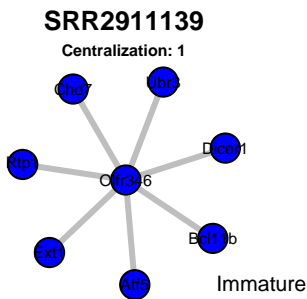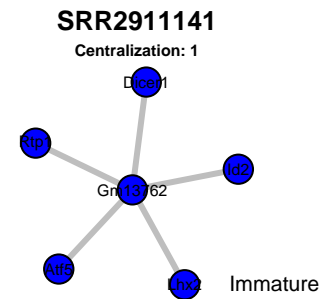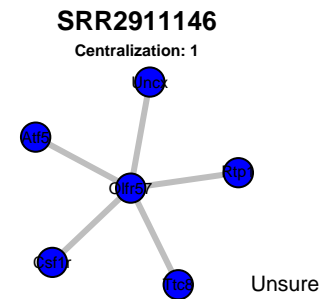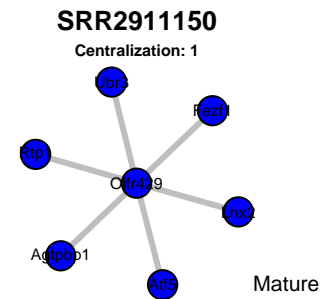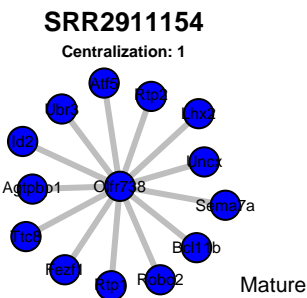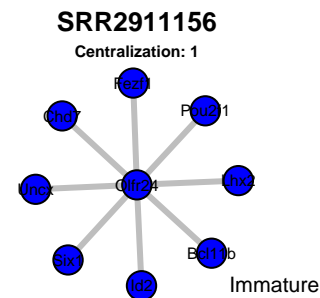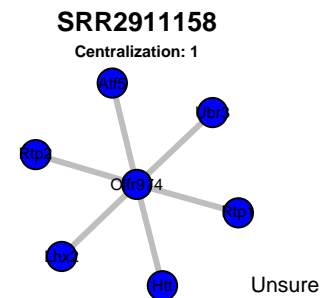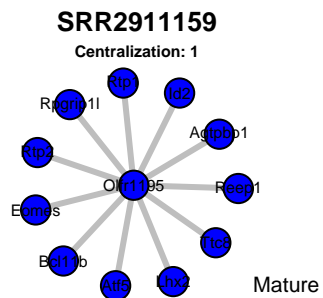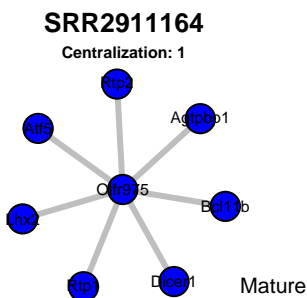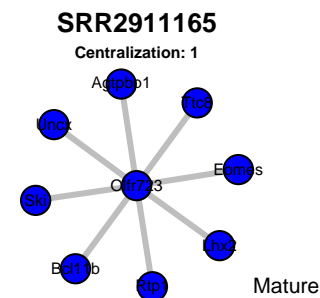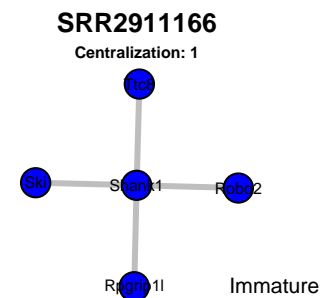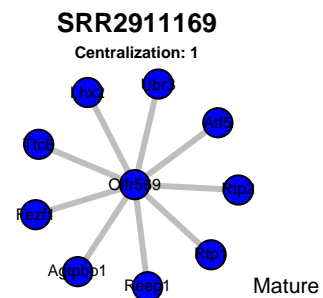

**SRR2911171**

Centralization: 1

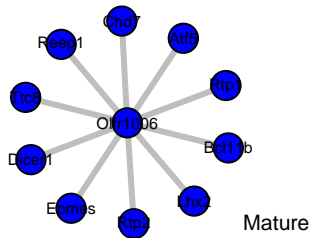**SRR2911179**

Centralization: 1

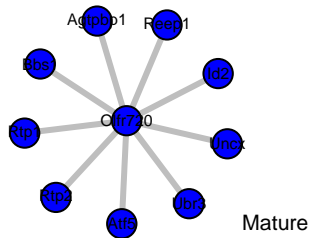**SRR2911181**

Centralization: 1

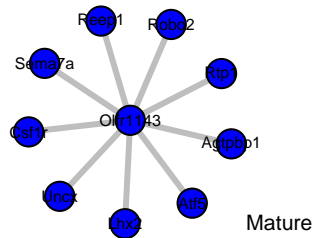**SRR2911185**

Centralization: 1

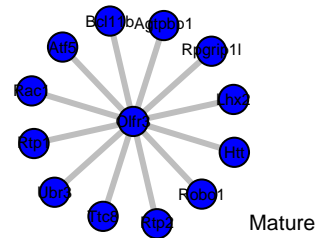**SRR2911193**

Centralization: 1

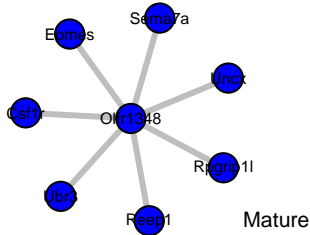**SRR2911198**

Centralization: 1

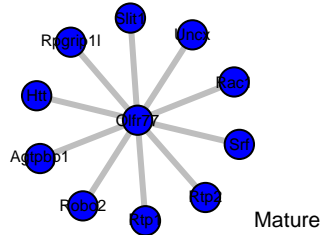**SRR2911202**

Centralization: 1

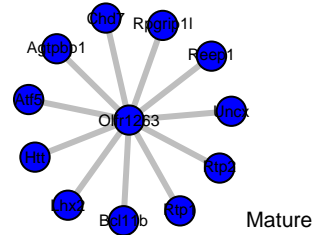**SRR2911203**

Centralization: 1

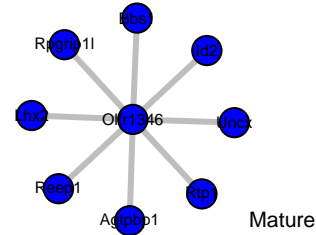**SRR2911204**

Centralization: 1

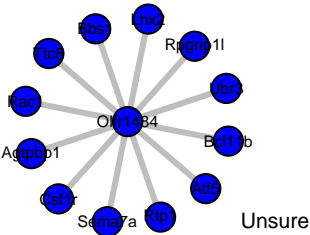**SRR2911205**

Centralization: 1

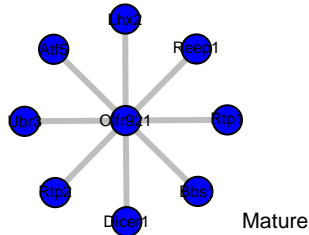**SRR2911207**

Centralization: 1

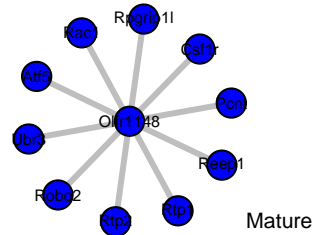**SRR2911208**

Centralization: 1

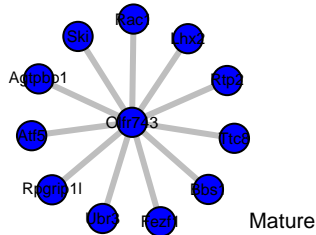**SRR2911209**

Centralization: 1

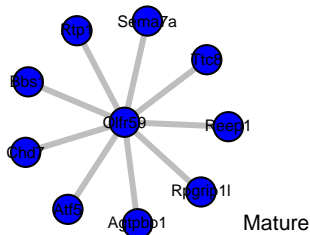**SRR2911211**

Centralization: 1

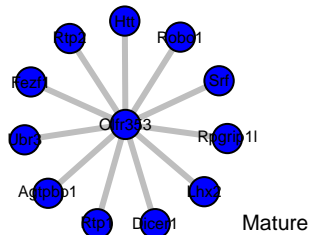**SRR2911212**

Centralization: 1

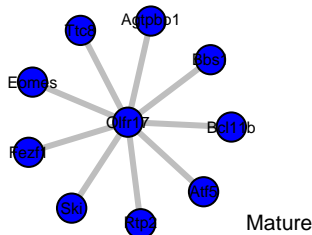**SRR2911214**

Centralization: 1

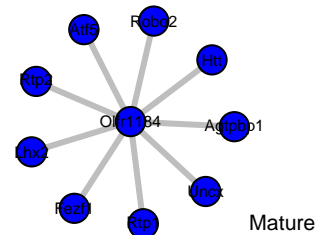**SRR2911215**

Centralization: 1

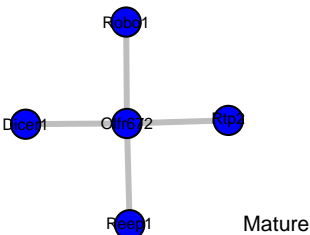**SRR2911216**

Centralization: 1

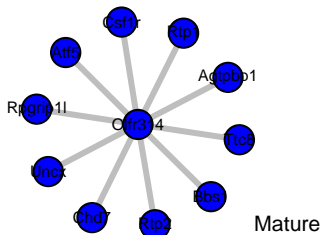**SRR2911217**

Centralization: 1

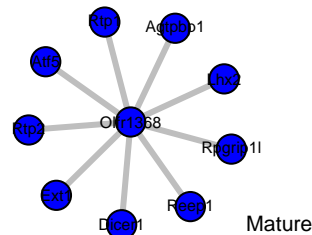**SRR2911218**

Centralization: 1

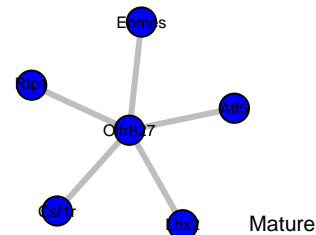**SRR2911219**

Centralization: 1

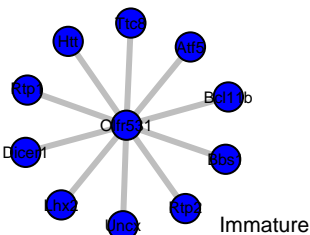**SRR2911222**

Centralization: 1

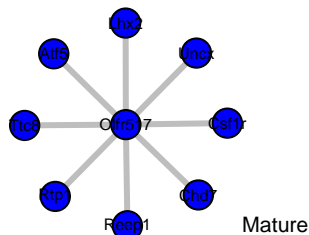**SRR2911223**

Centralization: 1

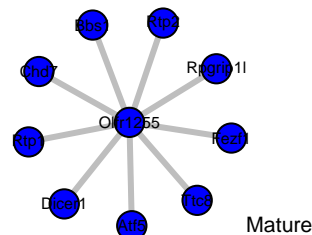**SRR2911224**

Centralization: 1

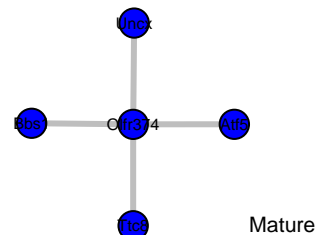



**SRR2911225**

Centralization: 1

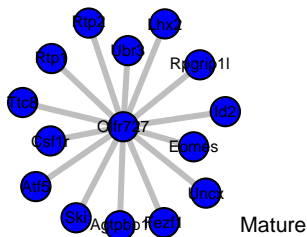**SRR2911227**

Centralization: 1

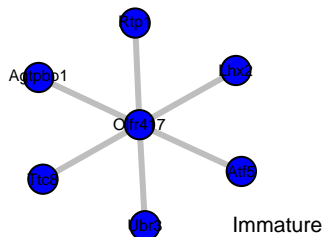**SRR2911228**

Centralization: 1

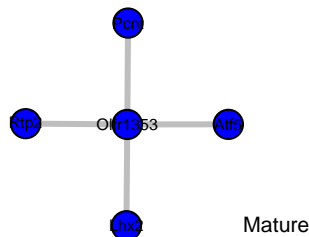**SRR2911229**

Centralization: 1

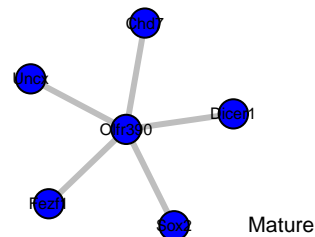**SRR2911230**

Centralization: 1

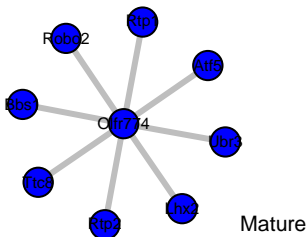**SRR2911232**

Centralization: 1

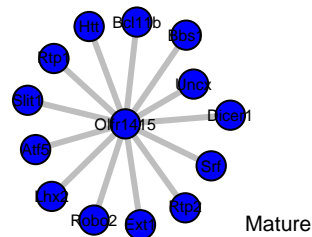**SRR2911236**

Centralization: 1

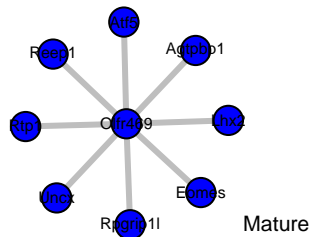**SRR2911240**

Centralization: 1

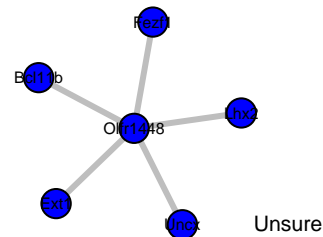**SRR2911243**

Centralization: 1

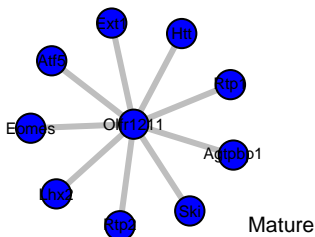**SRR2911245**

Centralization: 1

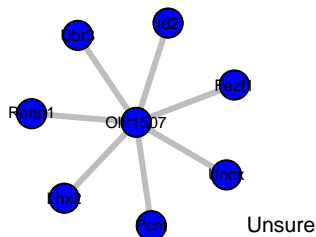**SRR2911246**

Centralization: 1

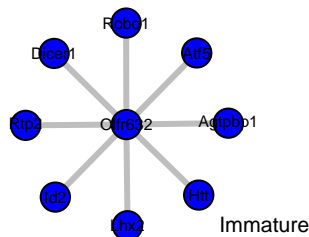**SRR2911251**

Centralization: 1

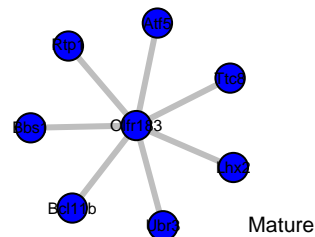**SRR2911253**

Centralization: 1

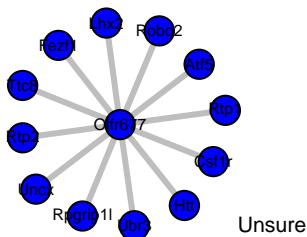**SRR2911265**

Centralization: 1

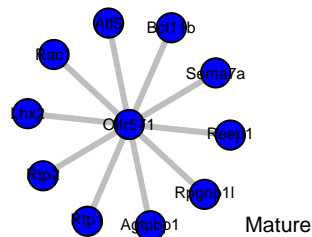**SRR2911266**

Centralization: 1

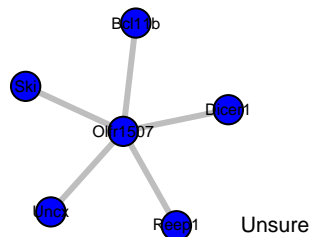**SRR2911272**

Centralization: 1

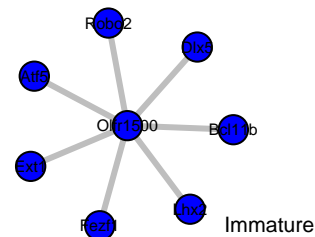**SRR2911275**

Centralization: 1

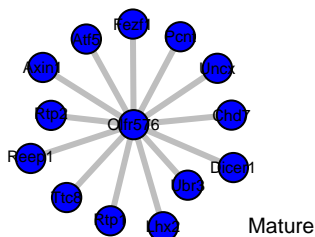**SRR2911276**

Centralization: 1

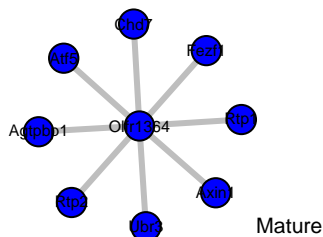**SRR2911283**

Centralization: 1

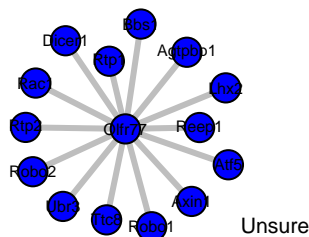

Supplement: 12918_2016_370_MOESM5_ESM.pdf [file 12918_2016_370_MOESM5_ESM.pdf]
