# Supplementary material for: Integrated single cell data analysis reveals cell specific networks and novel coactivation markers
Source: PubMed Central journal article supplement (PMC5249008; doi:10.1186/s12918-016-0370-4), 2016-12-05
Supplement: 12918_2016_370_MOESM2_ESM.pdf [file 12918_2016_370_MOESM2_ESM.pdf]

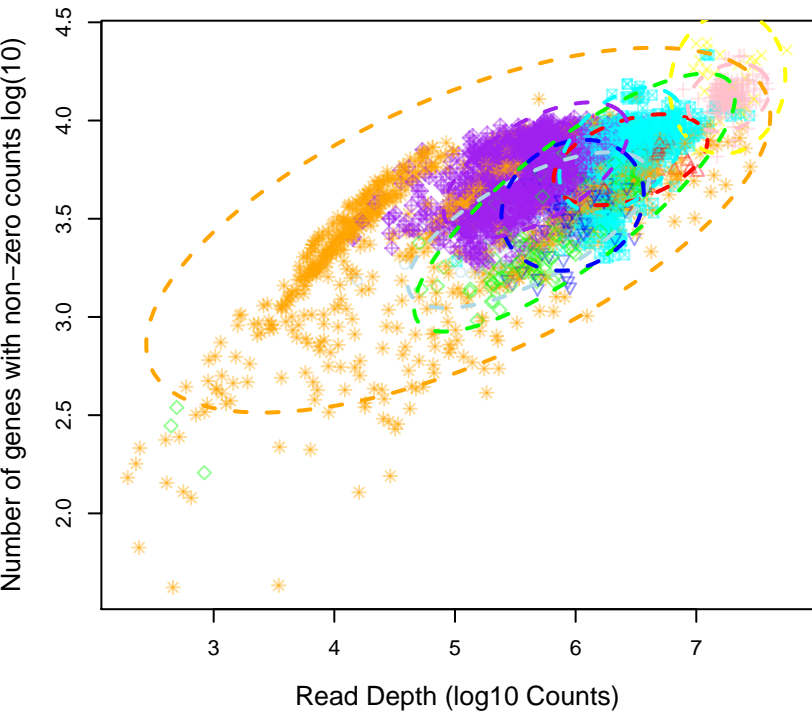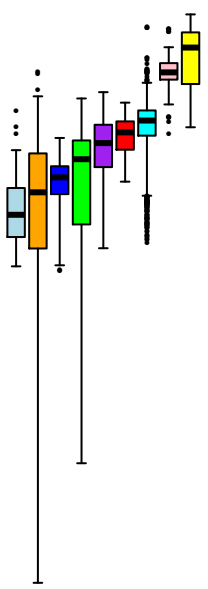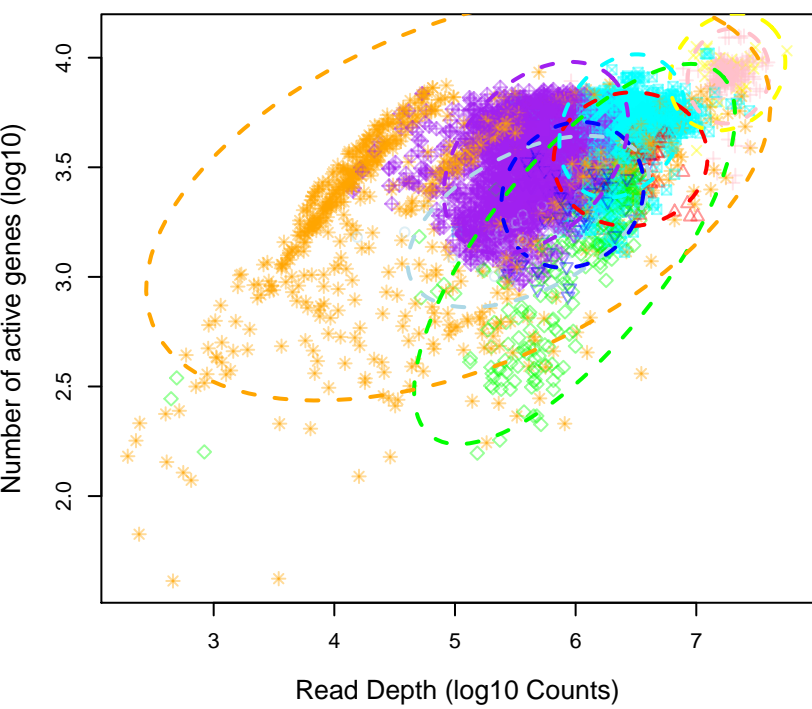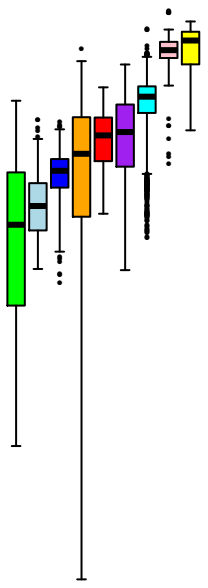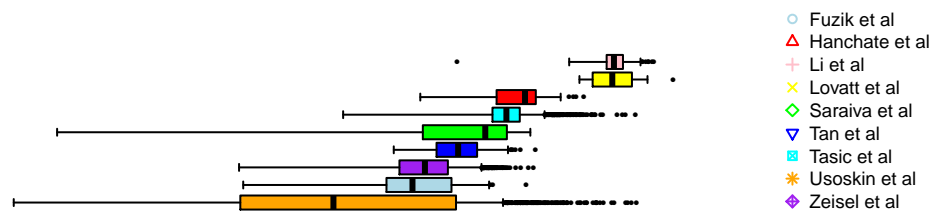

- Fuzik et al
- △ Hanchate et al
- + Li et al
- × Lovatt et al
- ◇ Saraiva et al
- ▽ Tan et al
- Tasic et al
- \* Usoskin et al
- ◆ Zeisel et al
