# Supplementary material for: Integrated single cell data analysis reveals cell specific networks and novel coactivation markers
Source: PubMed Central journal article supplement (PMC5249008; doi:10.1186/s12918-016-0370-4), 2016-12-05

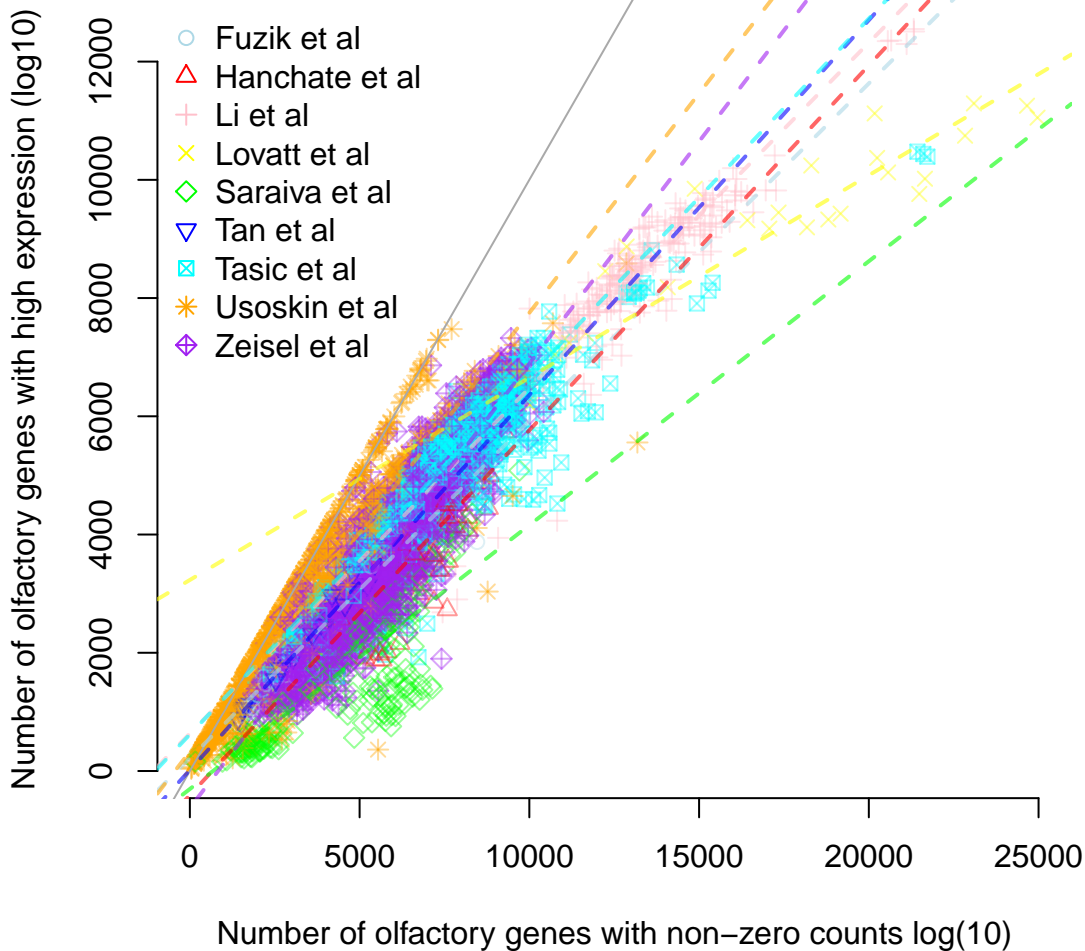

Supplement: 12918_2016_370_MOESM3_ESM.pdf [file 12918_2016_370_MOESM3_ESM.pdf]
